# Supplementary material
Source: Springer Nature journal article supplement (https://www.springermedizin.de/resource/supplementary/13054_2012_648_MOESM7_ESM.pdf/9708942)

### serum IL-6

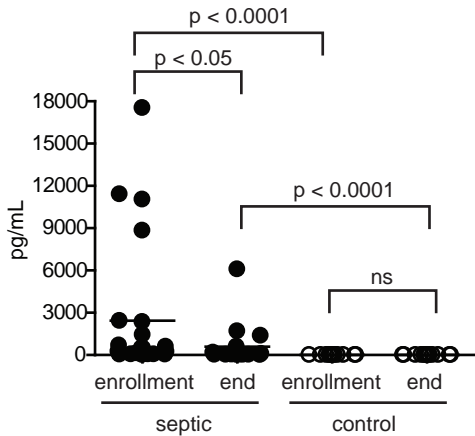

### serum IL-10

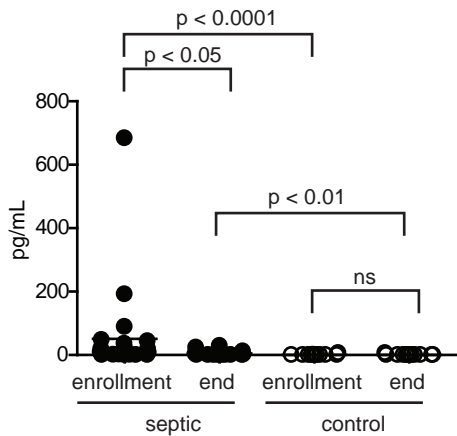

Supplement: MOESM7 [file 9708942]
